# Supplementary material for: The catalytic-induced sensing effect of triangular CeO2 nanoflakes for enhanced BTEX vapor detection with conventional ZnO gas sensors
Source: Royal Society of Chemistry journal article supplement (doi:10.1039/d0ta01708f), 2020-01-01
Supplement: d0ta01708f1.pdf [file d0ta01708f1.pdf]

Electronic Supplementary Information for  
**Catalytic-induced Sensing Effect of Triangular CeO<sub>2</sub>  
Nanoflakes for Enhanced BTEX Vapor Detection with  
Conventional ZnO Gas Sensors**

Ding Wang,<sup>a</sup> Yue Yin,<sup>a</sup> Pengcheng Xu,<sup>\*b,c</sup> Feng Wang,<sup>a</sup> Ping Wang,<sup>a</sup> Jingcheng Xu,<sup>a</sup>  
Xianying Wang<sup>\*a</sup> and Xinxin Li<sup>b,c</sup>

<sup>a</sup> School of Material Science & Engineering, University of Shanghai for Science and Technology, Shanghai, 200093, China. E-mail: xianyingwang@usst.edu.cn

<sup>b</sup> State Key Lab of Transducer Technology, Shanghai Institute of Microsystem and Information Technology, Chinese Academy of Sciences, 865 Changning Road, Shanghai 200050, China. E-mail: xpc@mail.sim.ac.cn

<sup>c</sup> University of Chinese Academy of Sciences, Beijing 100049, China

### **S1. Preparation of CeO<sub>2</sub> nanomaterials**

CeO<sub>2</sub> nanomaterials with different morphologies were prepared by hydrothermal method. In a typical process, the Ce(NO<sub>3</sub>)<sub>3</sub> solution was first obtained by dissolving 0.068 g of Ce(NO<sub>3</sub>)<sub>3</sub>·6H<sub>2</sub>O in 5 mL of deionized water. In addition, 9.6 g NaOH was dissolved in 35 mL deionized water. And then, the Ce(NO<sub>3</sub>)<sub>3</sub> solution was dropped into NaOH solution with continuously stirring at room temperature. After stirring for 30 minutes, the mixture was hydrothermally treated at 100 °C in a 50 mL Teflon-lined autoclave for 24 h. The precursor was then washed several times with deionized water

and ethanol and dried for 10 h at 80 °C. The final CeO<sub>2</sub> nanorods were obtained by heat treatment for 3 h at 500 °C. The CeO<sub>2</sub> microsphere was obtained by the similar hydrothermal method, except that 60 mmol urea was used instead of NaOH. CeO<sub>2</sub> micro-polyhedrons was prepared by the similar method to CeO<sub>2</sub> nanorods with the 180 °C hydrothermal treatment.

## **S2. Materials Characterization**

To characterize the morphology of the as-prepared samples, FE-SEM (FEI, Quanta FEG 450, USA) and Tecnai G220S-Twin transmission electron microscope were used with an accelerating voltage of 120 and 200 kV, respectively. The crystalline structure was analysed by using XRD (Breker, D8 Advance, Germany) with Cu-K $\alpha$  ( $\lambda = 0.15418$  nm) radiation in the range of 10-70° at room temperature. The Raman spectra measurements were conducted by using Raman Microscopy (Horiba, LabRAM HR Evolution, France) with an excitation wavelength of 532 nm. On-line mass spectrum (on-line MS) was implemented on a Pfeiffer ThermoStar mass spectrometer.

## **S3. Gas sensor measurement**

The gas sensing performance of gas sensor was measured by a static test system (Elite tech co. LTD) and the test gases were obtained by static distribution method. For the reducing gases and n-type MOS, the response of gas sensors is defined as  $S=R_a/R_g$ , where  $R_a$  is the gas sensor's resistance in air atmosphere and  $R_g$  is the resistance of gas sensor in target molecules contained atmosphere. The response and recovery time are defined as the time taken by the gas sensor to achieve the resistance changes ranging from  $R_a$  to  $R_a-90%$  ( $R_a-R_g$ ) and from  $R_g$  to  $R_g+90%$  ( $R_a-R_g$ ) in the case of adsorption and desorption of target gases, respectively. The exact values of temperature and relative humidity (RH) are

recorded by using a digital thermo-hygrometer (Dretec, model O251) which is prior placed on the testing chamber.

#### S4. Online MS experimental setup

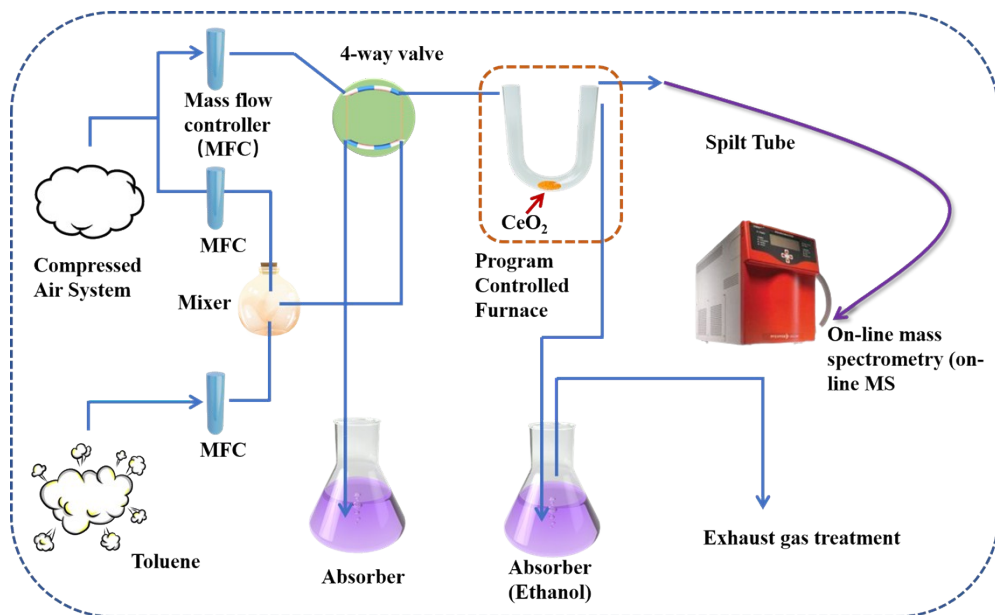

Fig. S1 Experimental setup for sensing product identification.

#### S5. Characterization results of CeO<sub>2</sub> materials

Table S1 Physicochemical characteristics of CeO<sub>2</sub> nanomaterials

| Samples                | Morphology <sup>a</sup> | Crystallite size <sup>b</sup><br>(nm) | I <sub>597</sub> /I <sub>460</sub> <sup>c</sup><br>(%) |
|------------------------|-------------------------|---------------------------------------|--------------------------------------------------------|
| CeO <sub>2</sub> -MSs  | Microsphere             | 12.3                                  | 1.1                                                    |
| CeO <sub>2</sub> -MPHs | Micro-polyhedrons       | 30.9                                  | 3.1                                                    |
| CeO <sub>2</sub> -NRs  | Nanorod                 | 17.5                                  | 4.7                                                    |
| CeO <sub>2</sub> -NFs  | Nanoflakes              | 10.3                                  | 11.7                                                   |

<sup>a</sup> The morphology of CeO<sub>2</sub> was obtained by SEM images in the Fig. 2(a-d), <sup>b</sup> the crystallite size of CeO<sub>2</sub> was estimated by using Scherrer equation based on XRD patterns in Fig. 2(e) of the manuscript, <sup>c</sup> the values of I<sub>597</sub>/I<sub>460</sub> was calculated by Raman spectra in Fig. 4(b).
